# Supplementary material
Source: Elsevier journal article supplement (https://www.sciencedirect.com/science/article/pii/S2173572722000029)
Supplement: mmc3 [file S2173572722000029:mmc3.pdf]

Table 1: Characteristics of included studie

| STUDY        | BRONCHIOLITIS SEVERITY CLASSIFICATION | SCORED USED TO STRATIFY                                                                                              | MEDIAN AGE            | # PATIENTS RANDOMIZED HFCN/CPAP | RESPIRATOR Y SYNCYTIAL VIRUS | PREMATURITY ANTECEDENT | BRONCHOPULMO NARY DYSPLASIA ANTECEDENT | TYPE DEVICE CPAP/HFNC                                  | DOSE INTERVENTIONS                                                                                                                                 | DEFINITION THERAPEUTIC FAILURE                                                                                                                                                                                                                                                                                                                                                                                      |
|--------------|---------------------------------------|----------------------------------------------------------------------------------------------------------------------|-----------------------|---------------------------------|------------------------------|------------------------|----------------------------------------|--------------------------------------------------------|----------------------------------------------------------------------------------------------------------------------------------------------------|---------------------------------------------------------------------------------------------------------------------------------------------------------------------------------------------------------------------------------------------------------------------------------------------------------------------------------------------------------------------------------------------------------------------|
| Cesar, 2020  | Severe                                | Wood Downes Score                                                                                                    | 2.69 months (SD 0,85) | 28/35                           | 56/63 (88,9%)                | 0                      | 0                                      | Dräger Evita 4 ventilator/ (Precision Flow; Vapotherm, | 6 cmH2O/ 8lt/min                                                                                                                                   | Need to escalate support to noninvasive bilevel or endotracheal intubation.                                                                                                                                                                                                                                                                                                                                         |
| Milesi, 2017 | Moderate or severe                    | Modified Wood's clinical asthma score (mWCAS) > 3                                                                    | 1,33 months (SD 1,16) | 71/71                           | 125/142 (88%)                | 26/142 (18,3%)         | 2/142 (1,4%)                           | Infant Flow Ventilator/ Optiflow                       | 7cmH2O/ 2lt/k/min                                                                                                                                  | Occurrence of one of the following criteria: (1) a 1-point increase in mWCAS compared with baseline; (2) RR rise >10 bpm compared with baseline, with RR >60 bpm; (3) a 1-point increase in the EDIN score compared with baseline, with EDIN >4 despite the use of hydroxyzine (1 mg/kg); and (4) more than two severe apnea episodes per hour, despite a loading dose of caf- feine (20 mg/kg) after the rst apnea |
| Sarkar, 2018 | Severe                                | Severe bronchiolitis who needed some respiratory support by CPAP or HNFC and/or Distress Assessment Index (RDAI) ≥11 | 3,41 months (SD 1,11) | 15/16                           | NR                           | NR                     | NR                                     | SERVO-i® /AIRVO™                                       | 4 - 8 cm H2O/ 2L/kg/min for the children less than equal to 10 kg and for children >10 kg 2L/kg/min for the first 10 kg + 0.5 L/kg/min for each kg | If HR and/or RR remained unchanged/increased; required FiO2 >60% for nCPAP with PEEP >8; required FiO2 >60% for HHHFNC with maximum O2 flow rate to maintain SpO2 >94% and no improvement or increase in RDAI score                                                                                                                                                                                                 |
